# Supplementary material
Source: PubMed Central journal article supplement (PMC3121830)
Supplement: 1102226108_pnas.1102226108_SI.pdf [file 1102226108_pnas.1102226108_SI.pdf]

# Supporting Information

Lamboy et al. 10.1073/pnas.1102226108

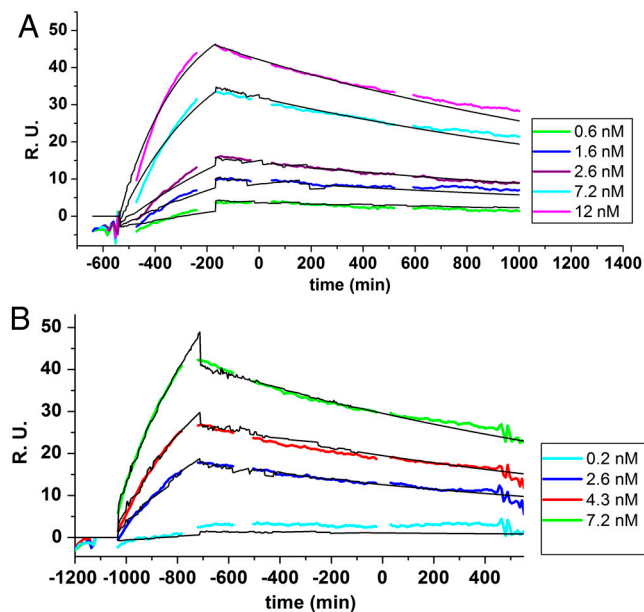

**Fig. S1.** SPR binding experiment in which a biotinylated NFκB(RelA:p50) was immobilized on a streptavidin chip, and the IκBα was bound. (A) Unlabeled IκBα containing the seven cysteines mutated to serine and two new cysteines introduced at 128 and 262. The kinetic constants were as follows:  $k_a 3.2 \times 10^5 \text{ M}^{-1} \text{ s}^{-1}$ ,  $k_d 5 \times 10^{-4} \text{ s}^{-1}$ ,  $R_{\text{max}} 64$ ,  $K_D 1.5 \times 10^{-9} \text{ M}$ . (B) The same protein as in A but labeled with Alexa 555 and 647. The kinetic constants were as follows:  $k_a 2.5 \times 10^5 \text{ M}^{-1} \text{ s}^{-1}$ ,  $k_d 4.5 \times 10^{-4} \text{ s}^{-1}$ ,  $R_{\text{max}} 101$ ,  $K_D 1.9 \times 10^{-9} \text{ M}$ .

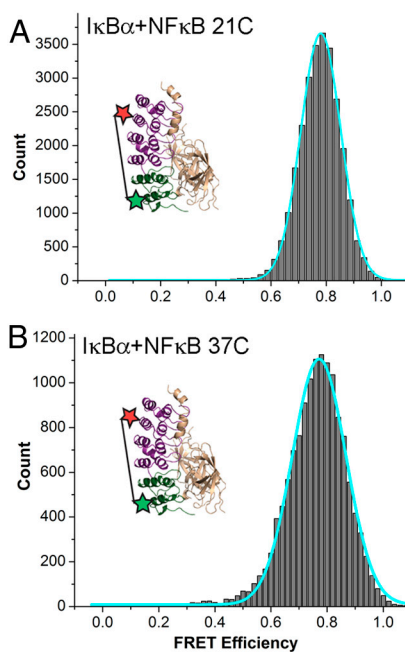

**Fig. S2.** Comparison of the single molecule FRET histograms of NFκB-bound IκBα at 21 °C (A) and 37 °C (B). The data for 37 °C is reproduced from Fig. 4A.
